# Supplementary material for: Adults with repaired tetralogy: low mortality but high morbidity up to middle age
Source: PubMed Central journal article supplement — Open Heart. 2017 Mar 1;4(1):e000564. doi: 10.1136/openhrt-2016-000564 (PMC5495176; doi:10.1136/openhrt-2016-000564), 2017-03-01
Supplement: openhrt-2016-000564supp001.pdf [file openhrt-2016-000564supp001.pdf]

**Supplementary Table 1: Echocardiographic Data Summary**

| <b>Echocardiogram data</b>                   | <b>All patients<br/>(n=164)</b> | <b>Serious Adverse event<br/>outcome (n=26)</b> | <b>No such outcome<br/>n= 139</b> | <b>P value</b> |
|----------------------------------------------|---------------------------------|-------------------------------------------------|-----------------------------------|----------------|
| RV dilatation mod/severe on initial visit    | 100 (61.0)                      | 19 (73)                                         | 81 (58.3)                         | 0.09           |
| RV function mod/severe on initial visit      | 9 (5.5)                         | 6 (23)                                          | 3 (2.2)                           | <0.001         |
| PR moderate/severe on initial visit          | 93 (56.7)                       | 14 (53.8)                                       | 79 (56.8)                         | 0.97           |
| RVOT Obstruction mod/severe on initial visit | 26 (15.9)                       | 6 (23)                                          | 20 (14.3)                         | 0.22           |

RV – right ventricle, PR – pulmonary regurgitation, RVOT – right ventricular outflow tract
