# Supplementary material for: Adults with repaired tetralogy: low mortality but high morbidity up to middle age
Source: PubMed Central journal article supplement — Open Heart. 2017 Mar 1;4(1):e000564. doi: 10.1136/openhrt-2016-000564 (PMC5495176; doi:10.1136/openhrt-2016-000564), 2017-03-01
Supplement: openhrt-2016-000564supp002.pdf [file openhrt-2016-000564supp002.pdf]

## Supplementary Table 2: Electrophysiology Data Summary

| <b>Variable</b>                   | <b>All Patients<br/>(n=166)</b> | <b>Serious Adverse Event<br/>outcome (n = 26)</b> | <b>No such outcome (n=<br/>142)</b> | <b>p value</b> |
|-----------------------------------|---------------------------------|---------------------------------------------------|-------------------------------------|----------------|
| History of atrial arrhythmia      | 29 (17.5)                       | 15 (57.7)                                         | 14 (9.9)                            | <0.001         |
| History of ventricular arrhythmia | 12 (7.2)                        | 12 (46.2)                                         | 0                                   | <0.001         |
| Permanent pacemaker               | 10 (6.0)                        | 5 (19.2)                                          | 5 (3.5%)                            | 0.002          |
| Mean age at PPM                   | 28.1 ± 24.2                     | 48.3 ± 19.8                                       | 11.9 ± 12.1                         | 0.01           |
| Required defibrillator            | 15 (9.0)                        | 11 (42.3)                                         | 4 (2.8)                             | <0.001         |
| Mean age at defibrillator         | 37 ± 9.0                        | 37.9 ± 9.9                                        | 34.5 ± 6.5                          | 0.27           |
| History of Ablation               | 18 (10.8)                       | 9 (34.6)                                          | 9 (6.3)                             | <0.001         |

PPM – permanent pacemaker
